# Supplementary material
Source: Springer Nature journal article supplement (https://www.springermedizin.de/resource/supplementary/13030_2007_18_MOESM1_ESM.pdf/9644556)

Surface EMG monitor

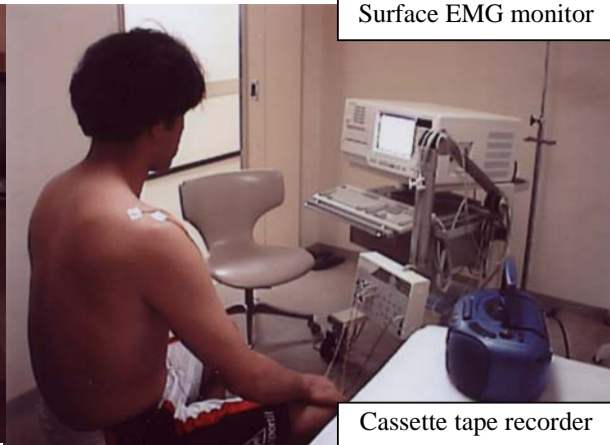

Cassette tape recorder

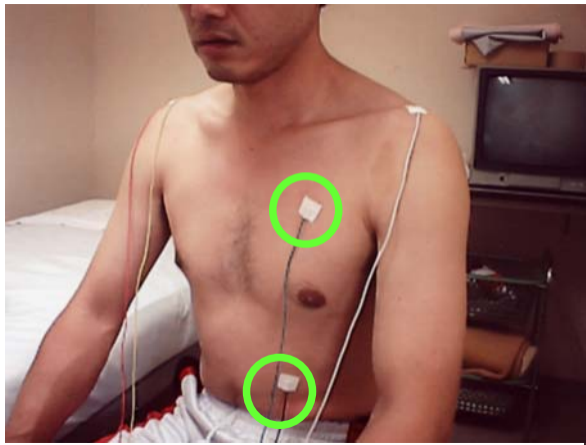

Supplement: MOESM1 [file 9644556]
